# Supplementary material for: Outcomes of phase I clinical trials for patients with advanced pancreatic cancer: update of the MD Anderson Cancer Center experience
Source: PubMed Central journal article supplement (PMC5675623; doi:10.18632/oncotarget.19897), 2017-08-03
Supplement: oncotarget-08-87163-s001.pdf [file oncotarget-08-87163-s001.pdf]

## **Outcomes of phase I clinical trials for patients with advanced pancreatic cancer: update of the MD Anderson Cancer Center experience**

### **SUPPLEMENTARY MATERIALS**

**Supplementary Table 1: Summary of best phase I clinical trials not described in Table 1.**

See Supplementary File 1
